# Supplementary material for: Wave-transparent LAS enabling superior bandwidth electromagnetic wave absorption of a 2D pitaya carbon slice
Source: Royal Society of Chemistry journal article supplement (doi:10.1039/d2ta03853f), 2022-01-01
Supplement: d2ta03853f1.pdf [file d2ta03853f1.pdf]

## Supporting Information

### Wave-transparent LAS Enabling Superior Bandwidth

### Electromagnetic Wave Absorption of 2D Pitaya Carbon Slice

*Chunyan Ding,<sup>a,e</sup> Hui Fu,<sup>a</sup> Tao Wu,<sup>a</sup> Yingjie Li,<sup>a</sup> Songsong Wu,<sup>\*,a,f</sup> Xiaozhen Ren,<sup>b</sup>  
Zengli Gao,<sup>a</sup> Kai Guo,<sup>a</sup> Long Xia,<sup>d</sup> Guangwu Wen,<sup>a,e,f</sup> and Xiaoxiao Huang,<sup>\*,c</sup>*

<sup>a</sup>School of Materials Science and Engineering, Shandong University of Technology,  
Zibo 255000, P.R. China

<sup>b</sup>School of Materials Science and Engineering, Liaocheng University, Liaocheng  
252000, P.R. China

<sup>c</sup>School of Materials Science and Engineering, Harbin Institute of Technology, Harbin  
150001, P. R. China

<sup>d</sup>School of Materials Science and Engineering, Harbin Institute of Technology at  
Weihai, Weihai 264200, P. R. China

<sup>e</sup>Shandong Institute of Advanced Ceramic Co., Ltd., Zibo 255000, P. R. China

<sup>f</sup>Shandong Industrial Ceramics Research & Design Institute Co., Ltd., Zibo 255000, P.  
R. China

\*Contact Number: (+86)13845075921 (X.X. Huang), (+86) 15552670275 (S.S. Wu)

\*To whom correspondence should be addressed: swliza@hit.edu.cn (X.X. Huang);  
wuss@sdut.edu.cn (S. S. Wu)

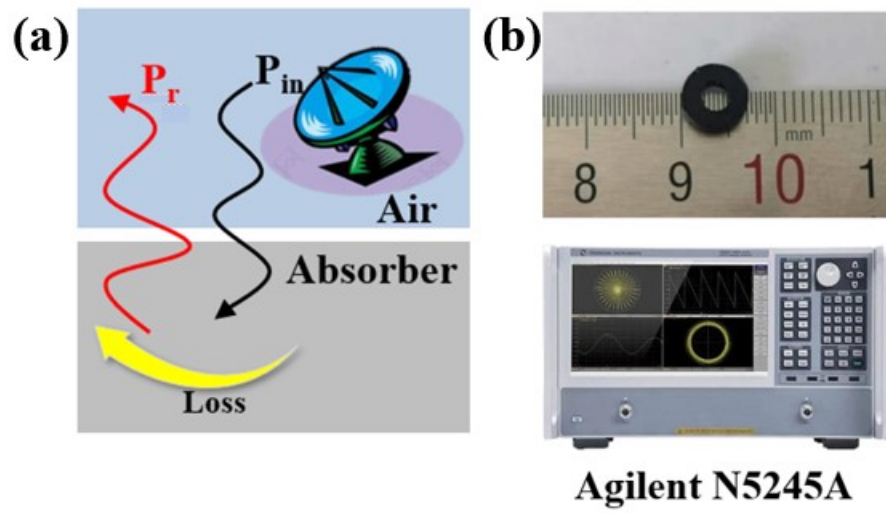

**Fig. S1.** Schematic illustration of EWA models(a); the photographs of the test sample and instrument (b).

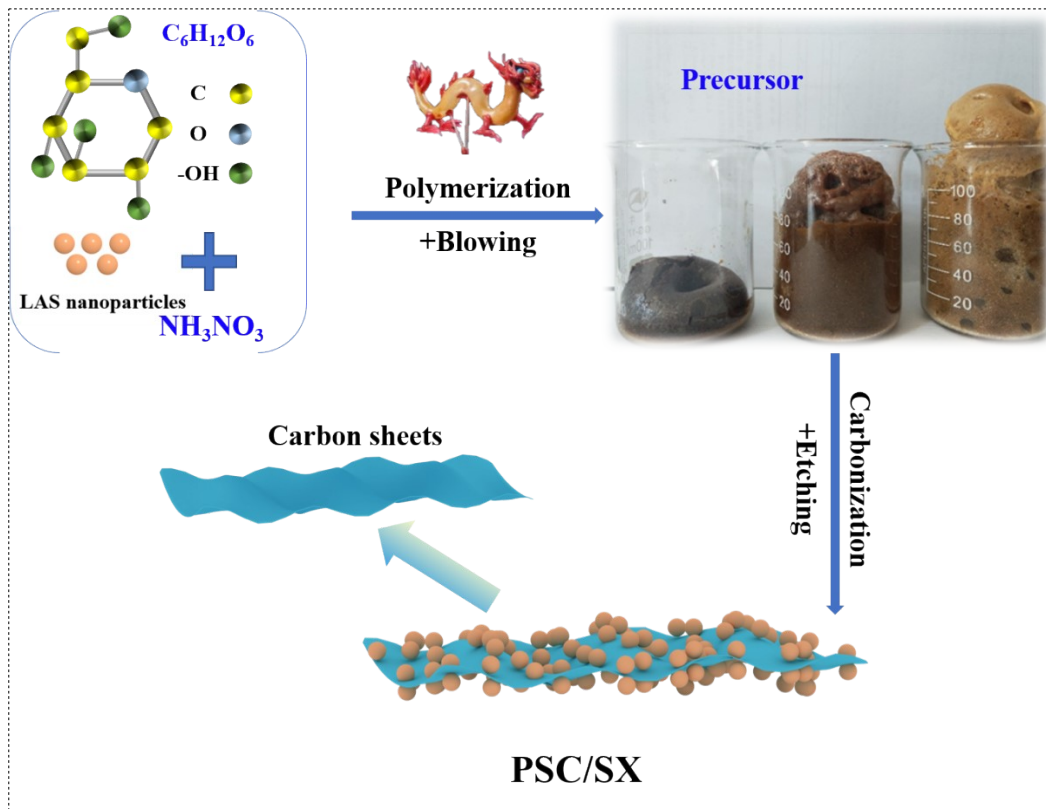

Fig. S2. Schematic fabrication process of PSC/S2.

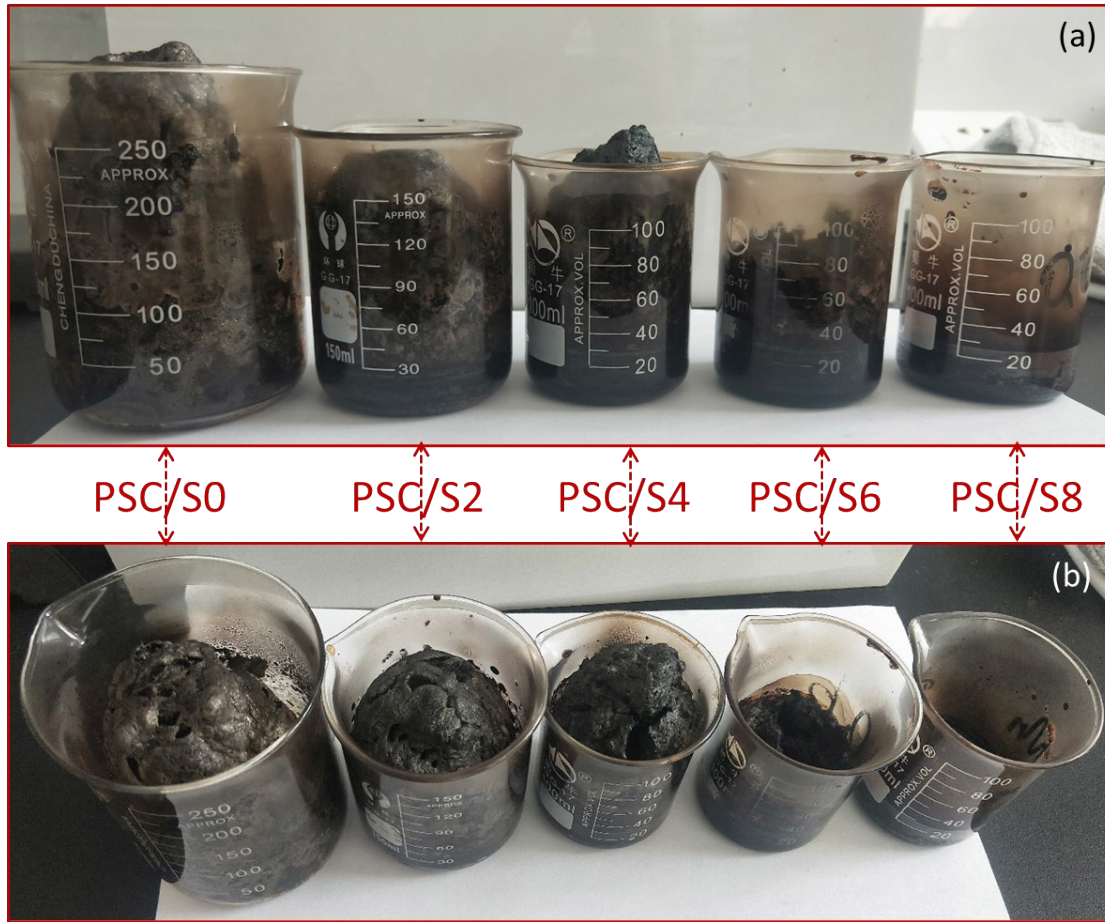

**Fig. S3.** The precursor photographs of PSC/S0, PSC/S2, PSC/S4, PSC/S6 and PSC/S8: side view (a), front view (b).

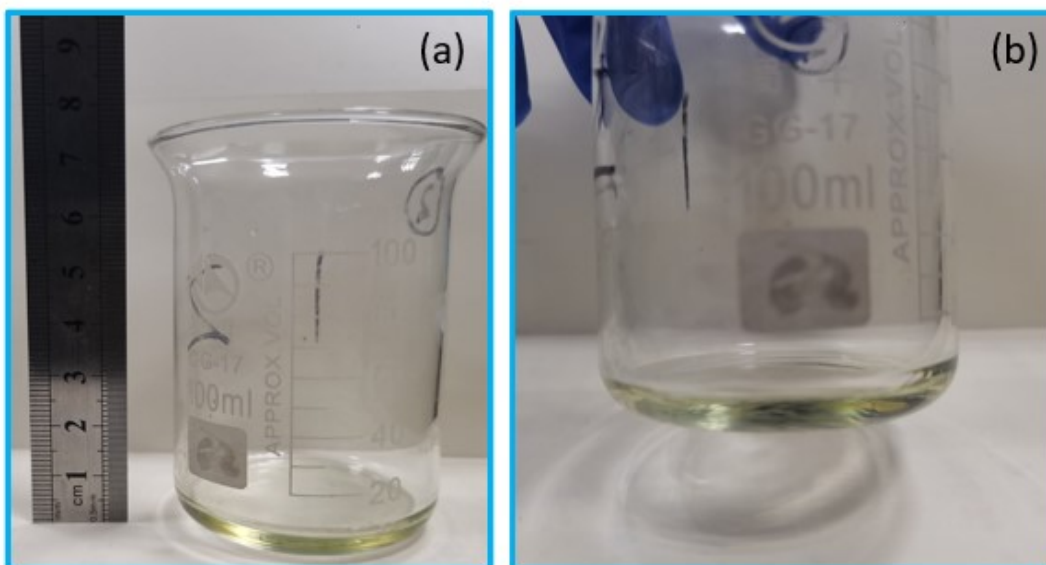

**Fig. S4.** The photographs of glucose self-polymerization sample (BC): front view (a), side view (b).

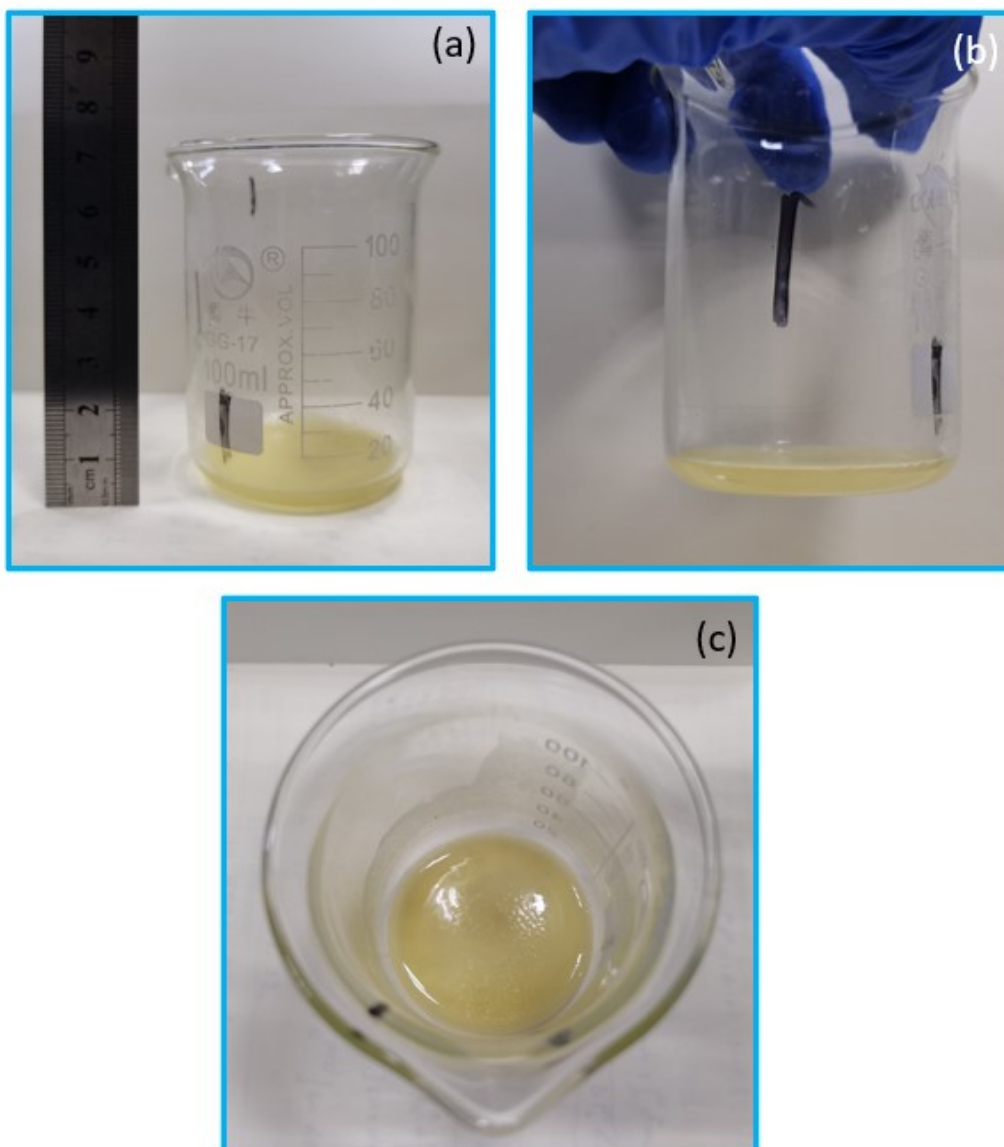

**Fig. S5.** The photographs of the glucose self-polymerization sample with nano-LAS as filler (BC/S): front view (a), side view (b), top view (c).

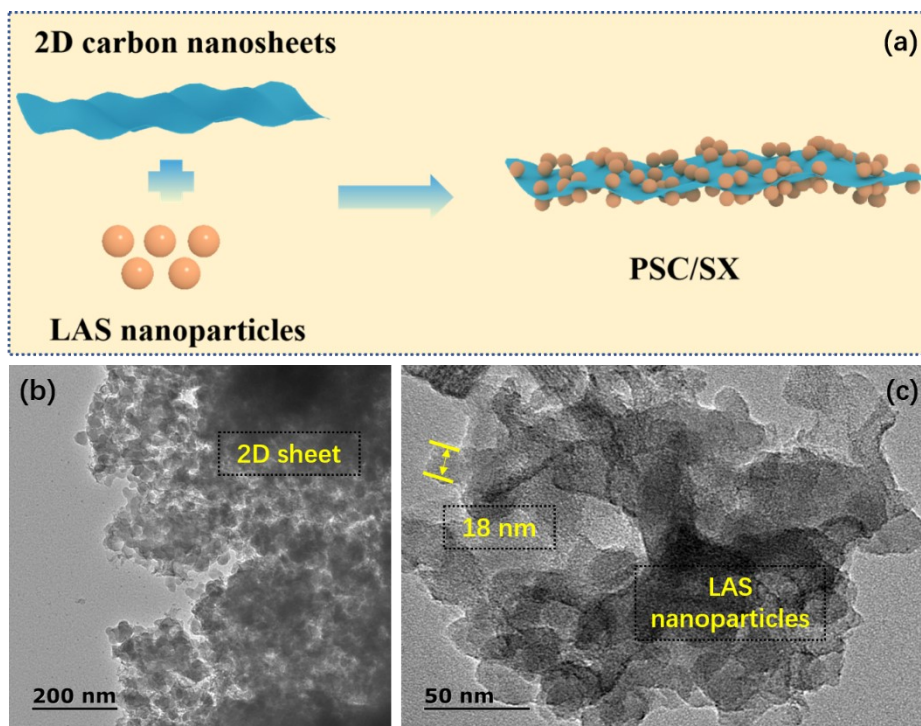

**Fig. S6.** Schematic diagram (a) and TEM images (b-c) of PSC/S2.

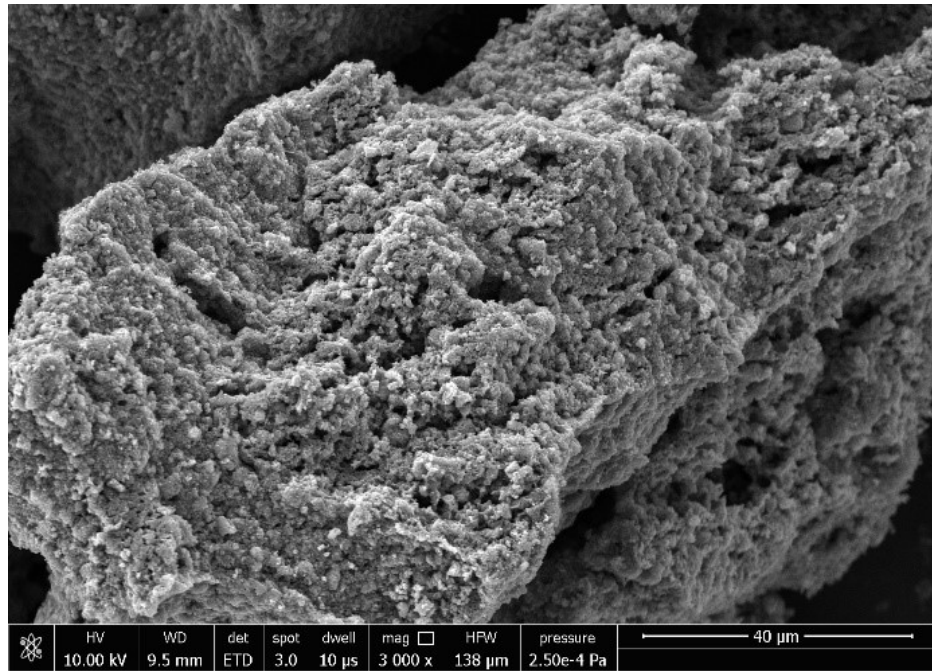

**Fig. S7.** Low magnification SEM images of the samples PSC/S8.



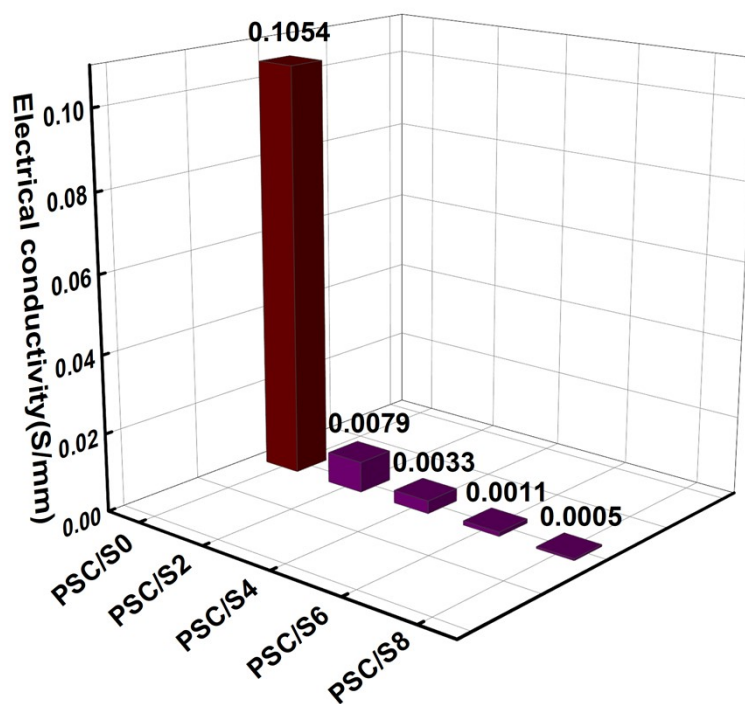

Fig. S8. Electrical conductivity of PSC/SX.

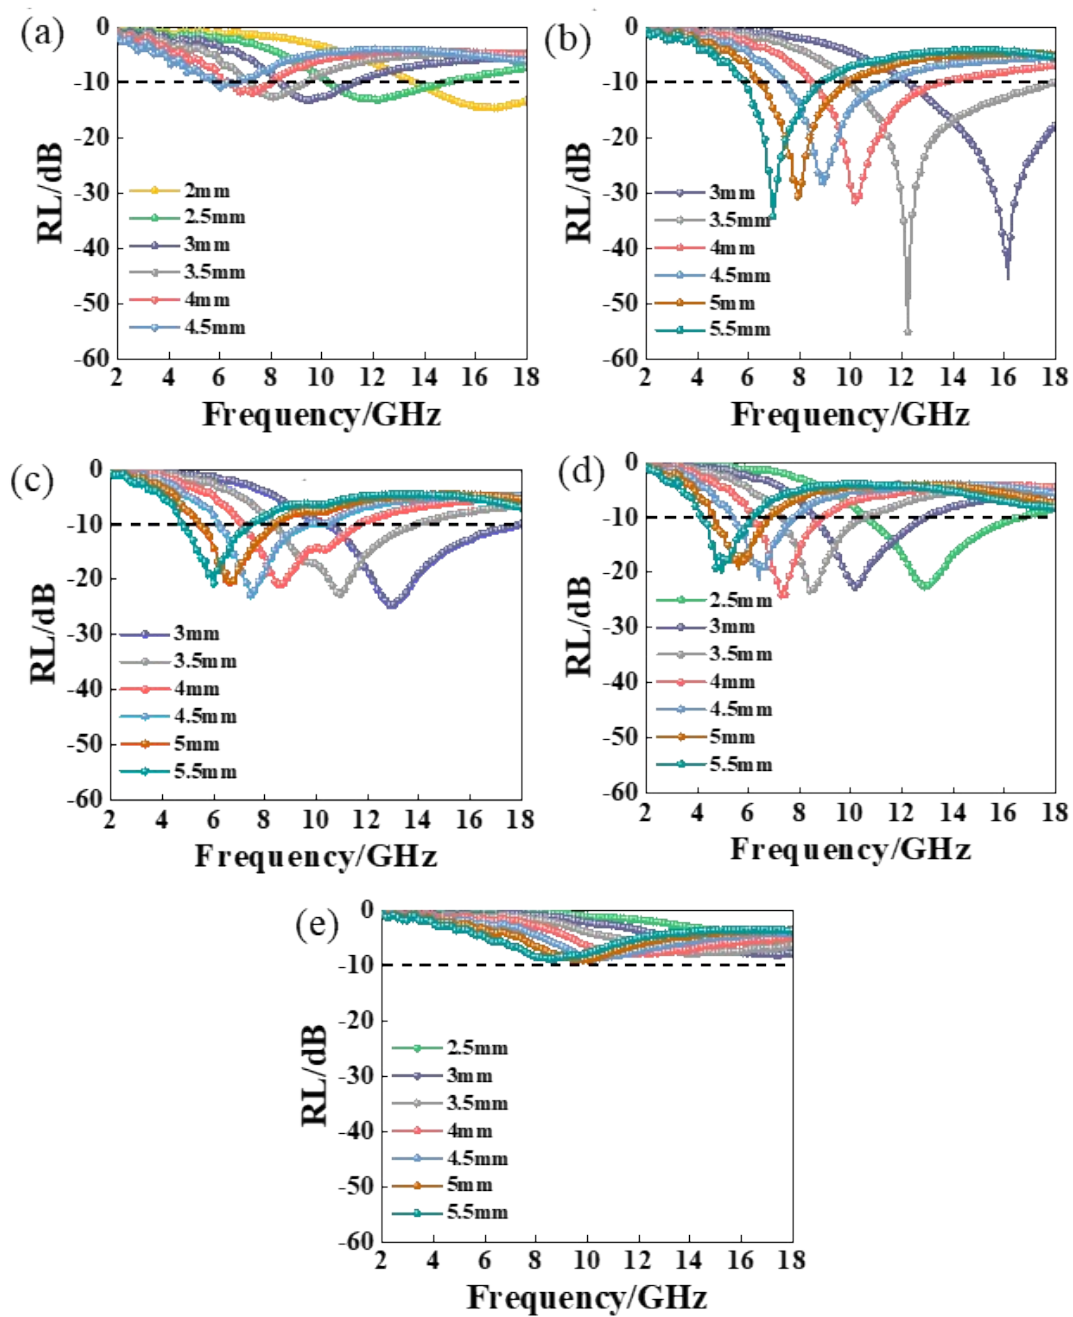

**Fig. S9.** The RL values vs. frequency at different thickness of PSC/S0 (a), PSC/S2 (b), PSC/S4 (c), PSC/S6 (d), and PSC/S8 (e).

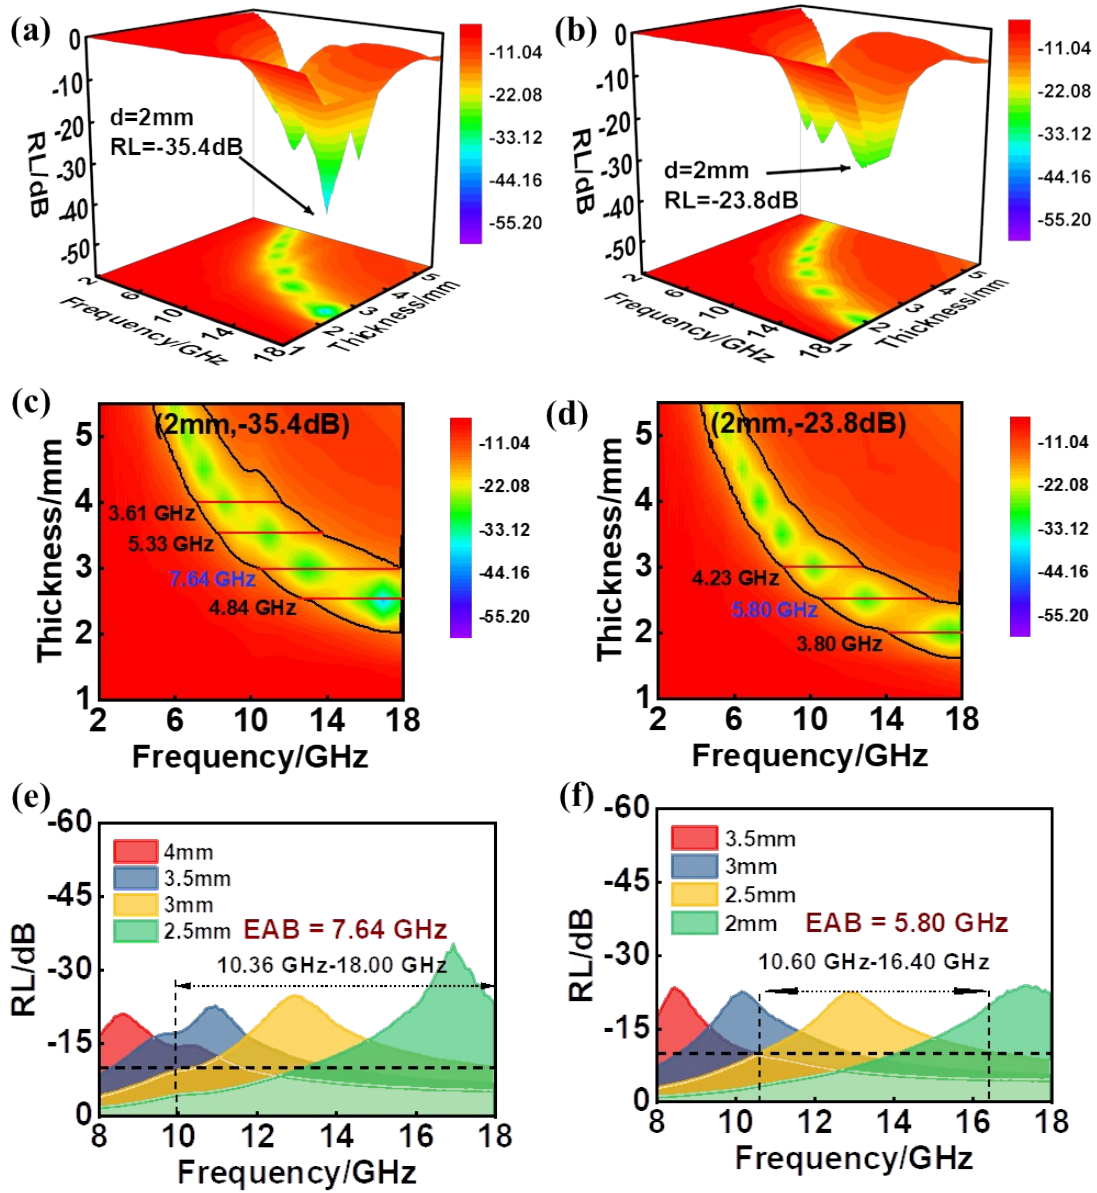

**Fig. S10.** 3D representation of RL (a, b); 3D projection plots of RL (c, d); the RL curves at different thicknesses (e, f).

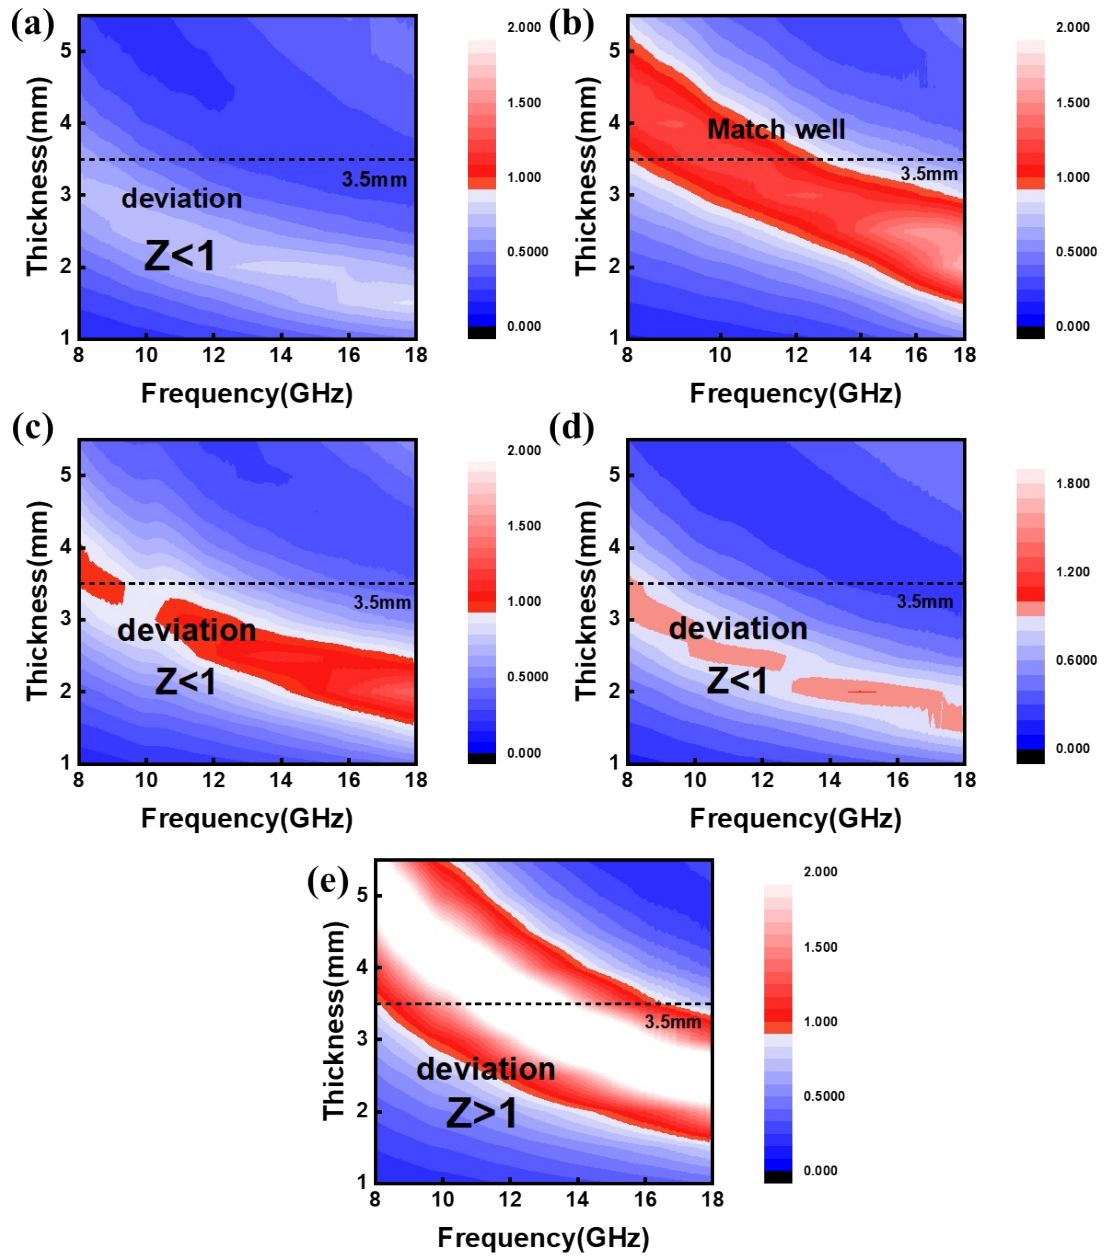

**Fig. S11.** Impedance matched 3D projection map of PSC/S0 (a), PSC/S2 (b), PSC/S4 (c), PSC/S6 (d), and PSC/S8 (e).

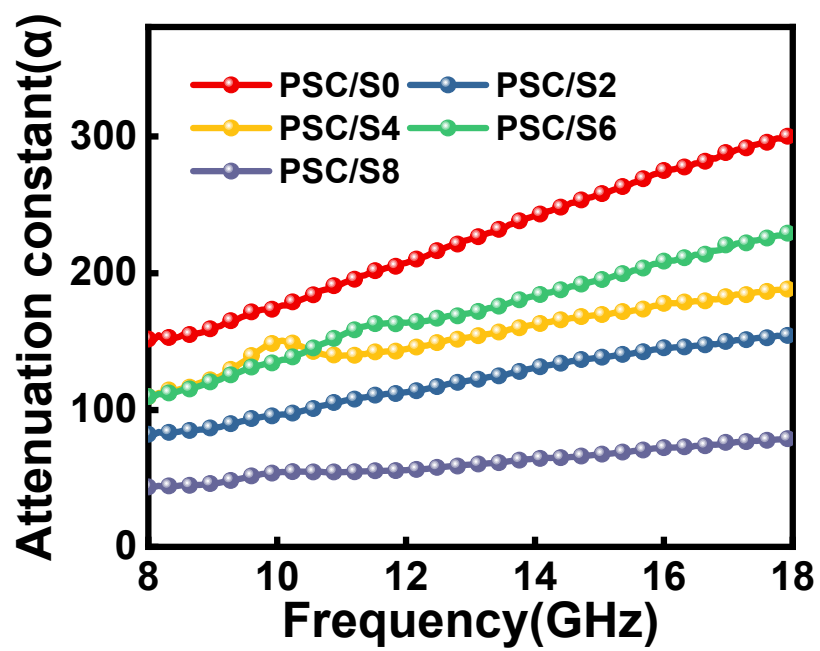

Fig. S12. Attenuation constant  $\alpha$  of PSC/S0, PSC/S2, PSC/S4, PSC/S6 and PSC/S8.
